# Supplementary material for: Gene expression alterations predict the pathological complete response in triple-negative breast cancer exploratory analysis of the NACATRINE trial
Source: PubMed Central journal article supplement (PMC10695933; doi:10.1038/s41598-023-48657-6), 2023-12-04

**SUPPLEMENTARY INFORMATION**

**Table s1.** Sensitivity and specificity and cutoff of significant genes in survival analysis

| <b>Gene</b>    | <b>Sensitivity</b> | <b>Specificity</b> | <b>Cutoff</b> |
|----------------|--------------------|--------------------|---------------|
| <i>ALDH1A1</i> | 79.2%              | 70.0%              | 7.74          |
| <i>CXCL9</i>   | 83.3%              | 71.9%              | 10.34         |
| <i>FGF1</i>    | 73.6%              | 76.7%              | 6.12          |
| <i>FGL2</i>    | 83.3%              | 77.1%              | 8.21          |
| <i>GRIN2A</i>  | 72.7%              | 75.4%              | 4.46          |
| <i>KCNB1</i>   | 70.0%              | 76.0%              | 3.96          |
| <i>SNAI1</i>   | 81.8%              | 72.8%              | 7.46          |
| <i>VEGFA</i>   | 77.0%              | 77.0%              | 9.19          |

**Table s2.** Differential analysis between pCR and RD in both treatment arms

| <b>Gene</b>    | <b>Fold-change</b> | <b>Expression</b> | <b>p-value</b> |
|----------------|--------------------|-------------------|----------------|
| <i>FOXC2</i>   | -3.18              | downregulated     | 0.001          |
| <i>KCNB1</i>   | -2.66              | downregulated     | 0.008          |
| <i>ZBTB16</i>  | -2.59              | downregulated     | 0.002          |
| <i>TFF1</i>    | -2.52              | downregulated     | 0.003          |
| <i>GRIN2A</i>  | -2.30              | downregulated     | 0.009          |
| <i>C5orf38</i> | -2.08              | downregulated     | 0.007          |
| <i>VEGFA</i>   | -2.06              | downregulated     | 0.004          |
| <i>HAS1</i>    | -1.96              | downregulated     | 0.007          |
| <i>INHBA</i>   | -1.92              | downregulated     | 0.006          |
| <i>PGR</i>     | -1.97              | downregulated     | 0.008          |
| <i>PLA2G4F</i> | -1.96              | downregulated     | 0.009          |
| <i>BNIP3</i>   | -1.85              | downregulated     | 0.005          |
| <i>FGF1</i>    | -1.89              | downregulated     | 0.005          |
| <i>DLL4</i>    | -1.78              | downregulated     | 0.003          |
| <i>SNAI1</i>   | -1.76              | downregulated     | 0.003          |
| <i>ADCY9</i>   | -1.64              | downregulated     | 0.005          |
| <i>RAD52</i>   | -1.51              | downregulated     | 0.008          |
| <i>HEMK1</i>   | -1.43              | downregulated     | 0.001          |
| <i>HDAC2</i>   | 1.54               | upregulated       | 0.004          |
| <i>MCM2</i>    | 1.63               | upregulated       | 0.004          |
| <i>ALDH1A1</i> | 2.11               | upregulated       | 0.005          |
| <i>FGL2</i>    | 2.27               | upregulated       | 0.006          |
| <i>CXADR</i>   | 2.29               | upregulated       | 0.005          |
| <i>CXCL9</i>   | 4.26               | upregulated       | 0.008          |

**Figure s1.** Design of the NACATRINE clinical trial.

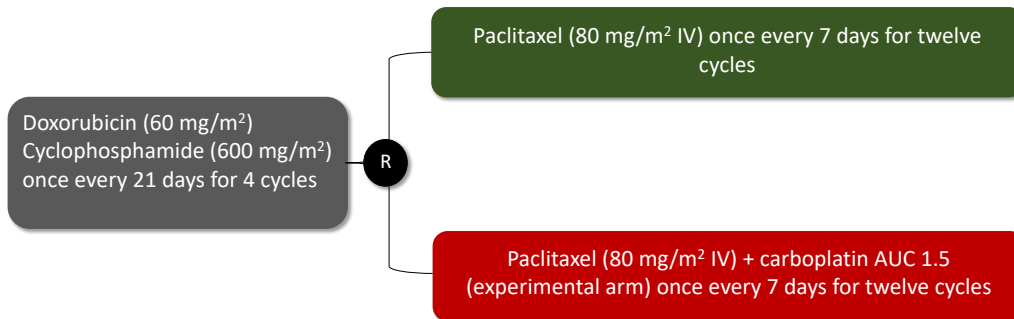

**Figure s2.** Consort of the exploratory analysis of the NACATRINE trial

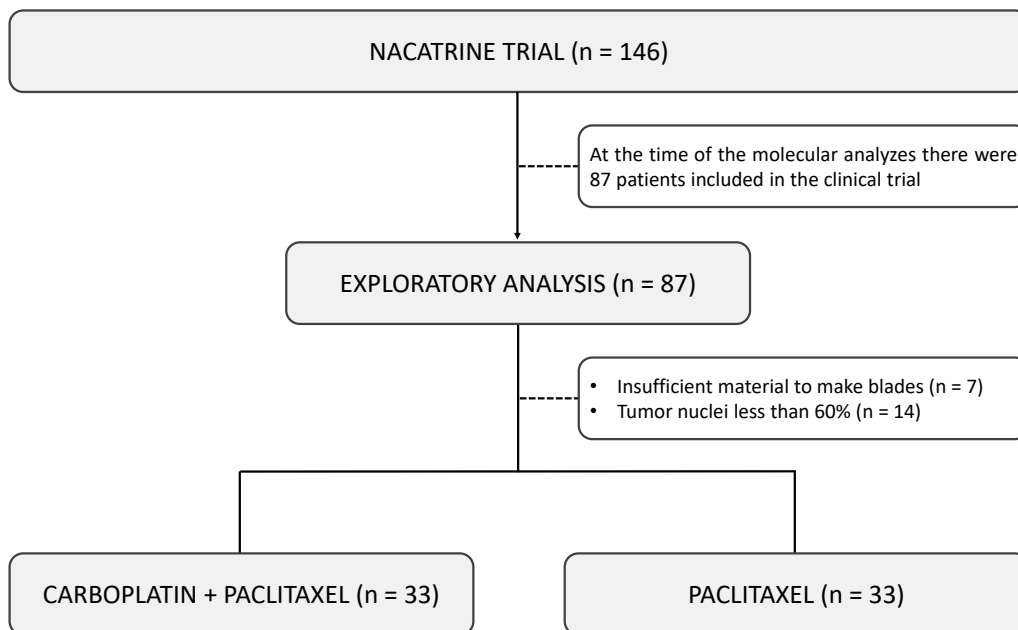

Supplement: 41598_2023_48657_MOESM1_ESM.pdf [file 41598_2023_48657_MOESM1_ESM.pdf]
